# Supplementary material for: Occurrence of randomly recombined functional 16S rRNA genes in Thermus thermophilus suggests genetic interoperability and promiscuity of bacterial 16S rRNAs
Source: PubMed Central journal article supplement (PMC6677816; doi:10.1038/s41598-019-47807-z), 2019-08-02
Supplement: 41598_2019_47807_MOESM1_ESM.pdf [file 41598_2019_47807_MOESM1_ESM.pdf]

## **Supplementary Information**

Occurrence of randomly recombined functional 16S rRNA genes in *Thermus thermophilus* suggests genetic interoperability and promiscuity of bacterial 16S rRNAs

Kentaro Miyazaki and Natsuki Tomariguchi

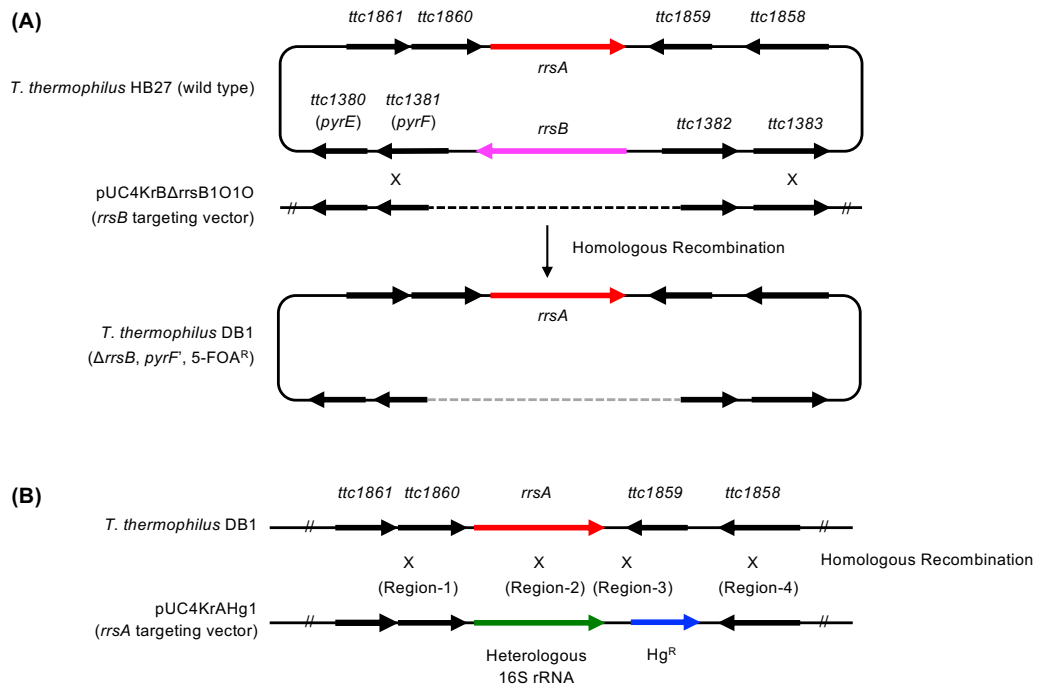

**Supplementary Fig. S1. Experimental horizontal gene transfer of 16S rRNA in *T. thermophilus*.**

**(A)** Creation of 16S rRNA gene knockout mutant of *T. thermophilus* HB27. A targeting vector (pUC4KrB $\Delta rrsB$ 1O10) was used to transform *T. thermophilus* HB27. Through a double crossover mechanism, a mutant strain designated DB1 was obtained. Given that the flanking *ttc1381* codes *pyrF*, by partially deleting the gene, the *rrsB*-deletion mutant was obtained as a 5-FOA resistant. **(B)** Interspecies exchange of 16S rRNA gene. *T. thermophilus rrsA* gene was replaced by a heterologous gene. *ttc1859*, which is nonessential for growth, was replaced by a thermostable Hg<sup>R</sup> gene for efficient screening of recombinants.

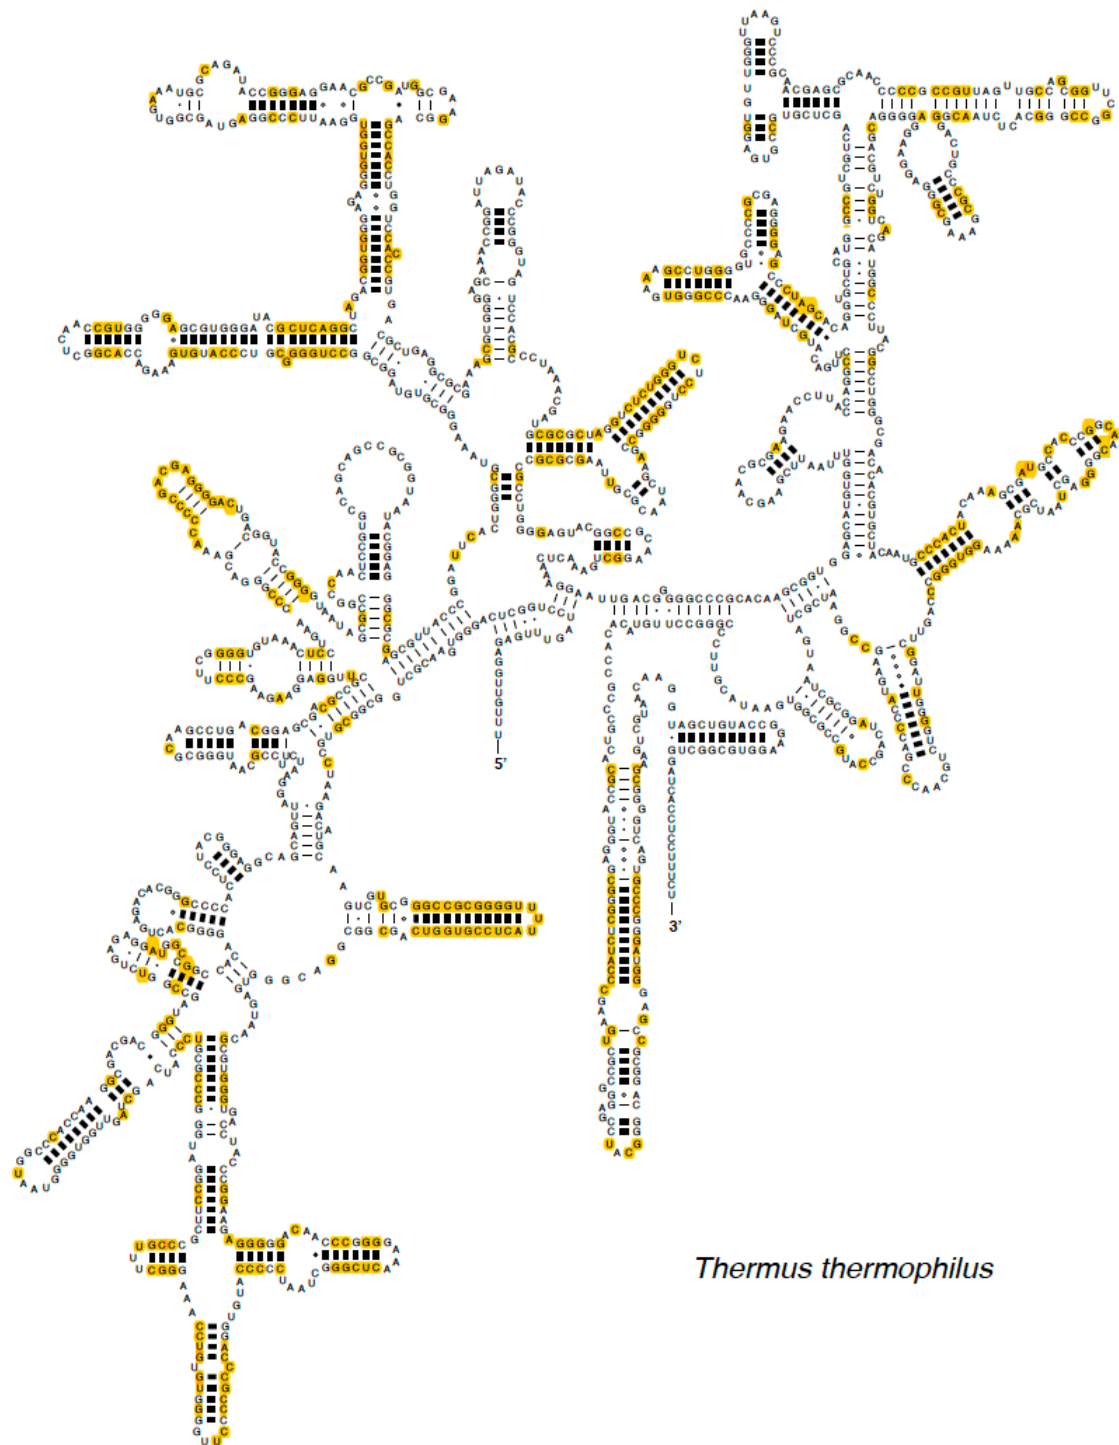

*Thermus thermophilus*

Supplementary Fig. S2. Different nucleotides in *M. ruber* and *D. radiodurans* 16S rRNAs mapped on the secondary structure of *T. thermophilus* 16S rRNA. Variable sites are shown in yellow. Large portions of the different nucleotides localized at the stem regions.



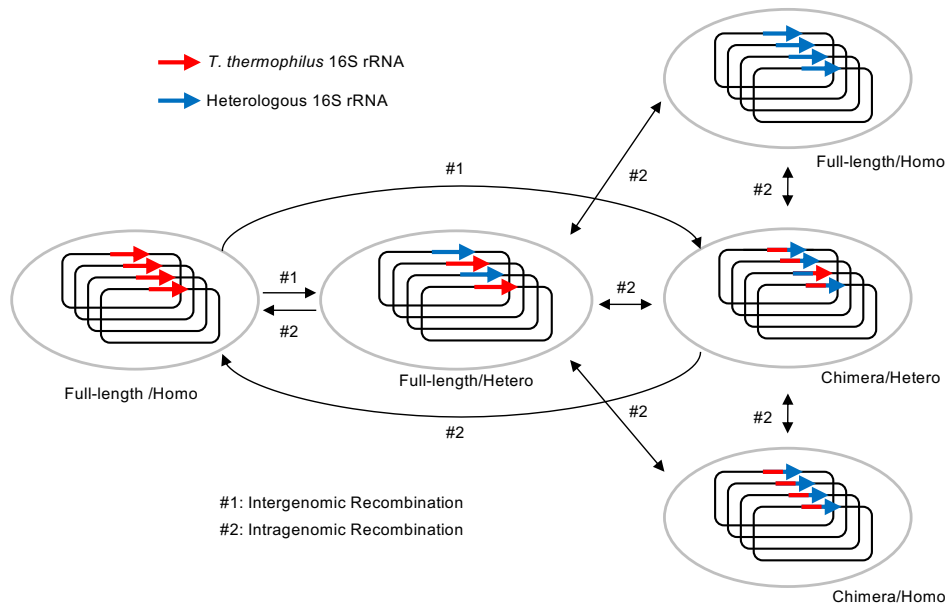

**Supplementary Fig. S4. Mechanism for generation of chimera in *T. thermophilus*.** *T. thermophilus* is a polyploid. Intergenomic followed by iterative intragenomic recombination promotes chimerization of 16S rRNA genes.

```

T. thermophilus AGACATGCAA GTTCGTGCGGGCCGCGGGGTTTTACTCCGTGGTCAGCGGGGACGGGTGAGTAACGCGTGG 120
D. radiodurans AGACATGCAA GTCGAACGCGGT-----CTT---CGGACCGAGTGGCGCACGGGTGAGTAACACGTAA 109
***** ** * ** * ** ** ** ** ** ** ** ** ** ** ** ** **

```

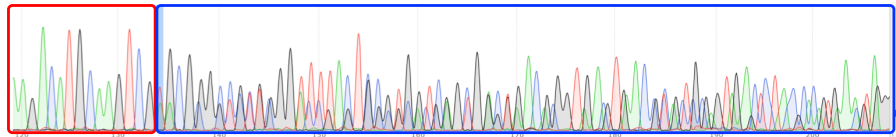

**Supplementary Fig. S5. An example of mixed sequencing chromatograms.** *T. thermophilus* is a polyploid and in some cases, allopolyploid status was observed as a mixed sequencing chromatogram in a heterogeneous region. In this figure, *T. thermophilus* and *D. radiodurans* sequences share identical sites but the different sites show superimposed sequences that may reflect the presence of insertions/deletions.

**Supplementary Table S1. List of *T. thermophilus* DB2 mutants**

| Donors<br>Mutants      | Chimera (Type) <sup>1</sup> or Full-length | Boundaries <sup>2</sup> | Database<br>ID |
|------------------------|--------------------------------------------|-------------------------|----------------|
| <i>T. kowarayensis</i> |                                            |                         | LC436704       |
| TY2                    | Chimera (HD)                               | 1115                    | LC436735       |
| TY5                    | Chimera (HD)                               | 1424                    | LC436727       |
| TY15                   | Chimera (HD)                               | 1075                    | LC436739       |
| TY16                   | Full-length                                | N.A. <sup>3</sup>       | LC436729       |
| <i>T. aquaticus</i>    |                                            |                         | LC440032       |
| TY10                   | Chimera (DHDHDH)                           | 748/846/1006/1251/1297  | LC436726       |
| TY23                   | Chimera (DHD)                              | 846/1006                | LC436717       |
| <i>T. Brockianus</i>   |                                            |                         | LC436697       |
| TY1                    | Chimera (DHDHD)                            | 262/265/1251/1424       | LC436725       |
| TY11                   | Chimera (HD)                               | 1424                    | LC436732       |
| TY12                   | Full-length                                | N.A. <sup>3</sup>       | LC436719       |
| <i>T. scotoductus</i>  |                                            |                         | LC436703       |
| TY3                    | Full-length                                | N.A. <sup>3</sup>       | LC436721       |
| <i>M. ruber</i>        |                                            |                         | LC436693       |
| TY9                    | Chimera (HD)                               | 974                     | LC436709       |
| TY19                   | Chimera (HDHD)                             | 543/822/1244            | LC436695       |
| TY20                   | Chimera (HD)                               | 1409                    | LC436700       |
| TY25                   | Full-length                                | N.A. <sup>3</sup>       | LC436711       |
| TY40                   | Chimera (HDH)                              | 1075/1474               | LC436714       |
| Mru2                   | Chimera (HD)                               | 382                     | LC440033       |
| <i>D. radiodurans</i>  |                                            |                         | LC436701       |
| TY32                   | Chimera (DHD)                              | 989/1410                | LC436728       |
| TY34                   | Full-length                                | N.A. <sup>3</sup>       | LC436723       |
| TY38                   | Chimera (HDH)                              | 264/286                 | LC436715       |
| S52                    | Chimera (HD)                               | 1357                    | LC436736       |
| S66                    | Chimera (HD)                               | 1242                    | LC436699       |
| <i>R. marinus</i>      |                                            |                         | LC436722       |
| 42                     | Full-length                                | N.A. <sup>3</sup>       | LC436737       |
| 48                     | Chimera (DHD)                              | 955/1356                | LC436702       |
| 53                     | Chimera (DHD)                              | 812/904                 | LC436696       |
| S40                    | Chimera (HD)                               | 881                     | LC436731       |
| S41                    | Chimera (HD)                               | 1409                    | LC436734       |
| S44                    | Chimera (HD)                               | 1356                    | LC436740       |

|                        |                |                   |          |
|------------------------|----------------|-------------------|----------|
| S86                    | Chimera (DHD)  | 955/1326          | LC436738 |
| <i>R. xylanophilus</i> |                |                   | LC436710 |
| 61                     | Full-length    | N.A. <sup>3</sup> | LC436724 |
| 63                     | Chimera (DH)   | 1410              | LC436720 |
| 89                     | Chimera (HD)   | 906               | LC436712 |
| Rxy3                   | Chimera (DHD)  | 907/1343          | LC440343 |
| <i>T. maritima</i>     |                |                   | LC436716 |
| S1                     | Chimera (HDHD) | 1116/1152/1232    | LC436698 |
| S2                     | Chimera (HD)   | 1414              | LC436713 |
| S7                     | Chimera (HD)   | 904               | LC436694 |
| S17                    | Chimera (HD)   | 949               | LC436707 |
| <i>A. aeolicus</i>     |                |                   | LC436706 |
| S4                     | Chimera (HD)   | 1393              | LC436705 |
| S8                     | Chimera (HD)   | 1414              | LC436730 |
| S10                    | Chimera (HD)   | 1383              | LC436718 |
| S29                    | Chimera (HD)   | 1510              | LC436708 |

<sup>1</sup> Donor sequence is denoted by D and host *T. thermophilus* sequence is denoted by H.

<sup>2</sup> Boundary is defined by the first nucleotide site that distinguishes two sequences. For example, the TY2 chimeric mutant from 5' end to nucleotide position 1114 derives from *T. thermophilus* (H) and from 1115 to 3' end from *T. kowarayensis* (D). *E. coli* numbering.

<sup>3</sup> N.A., not applicable.



**Supplementary Table S2. Nucleotide composition of *T. thermophilus*, *M. ruber*, and *D. radiodurans* 16S rRNA genes**

|             |                        | A   | T   | G   | C   | %GC   | Total |
|-------------|------------------------|-----|-----|-----|-----|-------|-------|
| Full-length | <i>T. thermophilus</i> | 311 | 237 | 546 | 427 | 0.64  | 1521  |
|             | <i>M. ruber</i>        | 347 | 288 | 488 | 368 | 0.574 | 1491  |
|             | <i>D. radiodurans</i>  | 367 | 304 | 483 | 350 | 0.554 | 1504  |
| Consensus   |                        | 260 | 188 | 391 | 267 | 0.595 | 1106  |
| Variable    | <i>T. thermophilus</i> | 51  | 49  | 155 | 160 | 0.759 | 415   |
|             | <i>M. ruber</i>        | 87  | 100 | 97  | 101 | 0.514 | 385   |
|             | <i>D. radiodurans</i>  | 107 | 116 | 92  | 83  | 0.44  | 398   |

**Supplementary Table S3. Molecular mass of ribosomal proteins in 30S subunit <sup>1</sup>**

| Proteins | <i>T. thermophilus</i> | <i>A. aeolicus</i> | <i>T. maritima</i> |
|----------|------------------------|--------------------|--------------------|
| S1       | 59851.6                | 60769.2            | 61356.7            |
| S2       | 29228.3                | 31429.0            | 29887.9            |
| S3       | 26672.6                | 24137.2            | 24057.8            |
| S4       | 24306.0                | 24796.6            | 24702.3            |
| S5       | 17525.2                | 23192.7            | 18461.4            |
| S6       | 11954.6                | 13455.3            | 15351.3            |
| S7       | 17997.7                | 18606.5            | 13439.3            |
| S8       | 15791.3                | 19439.6            | 15270.7            |
| S9       | 14369.4                | 17046.5            | 15179.4            |
| S10      | 11911.8                | 12217.2            | 11618.6            |
| S11      | 13694.6                | 13508.5            | 14074.2            |
| S12      | 15119.7                | 14188.4            | 14042.4            |
| S13      | 14312.6                | 14321.6            | 14413.6            |
| S14      | 7121.6                 | 7485.0             | 7324.9             |
| S15      | 10536.2                | 10888.7            | 10789.7            |
| S16      | 10766.2                | 13020.2            | 11235.9            |
| S17      | 12278.4                | 12817.8            | 12549.4            |
| S18      | 10241.1                | 8694.2             | 8997.9             |
| S19      | 10563.3                | 21624.1            | 10880.8            |
| S20      | 11684.9                | 13249.3            | 11274.1            |
| Total    | 345927.0               | 374887.5           | 344908.4           |

<sup>1</sup> Genomic sequences used for calculation were as follows: AE017221.1 (*T. thermophilus*); NC\_000918.1 (*A. aeolicus*); NC\_000853.1 (*T. maritima*).

**Supplementary Table S4. Natural occurrence of HGT in 16S rRNAs**

| Phylogeny                                                              | Type of HGT                                     | References                                        |
|------------------------------------------------------------------------|-------------------------------------------------|---------------------------------------------------|
| <i>Haloarcula marismortui</i><br>(Euryarchaeota)                       | Intragenomic<br>heterogeneity                   | Mylvaganam and Dennis,<br>1992 <a href="#">45</a> |
| <i>Aeromonas</i> (Proteobacteria)                                      | Chimeragenesis                                  | Sneath et al., 1993 <a href="#">46</a>            |
| <i>Rhizobium</i> (Proteobacteria)<br><i>Aeromonas</i> (Proteobacteria) | Chimeragenesis                                  | Eardly et al., 1996 <a href="#">47</a>            |
| <i>Escherichia</i> and <i>Salmonella</i><br>(Proteobacteria)           | Intragenomic<br>heterogeneity<br>Chimeragenesis | Cilia et al., 1996 <a href="#">48</a>             |
| <i>Thermobispora bispora</i><br>(Actinobacteria)                       | Intragenomic<br>heterogeneity                   | Wang et al., 1997 <a href="#">49</a>              |
| <i>Vibrio cholerae</i> (Proteobacteria)                                | Intragenomic<br>heterogeneity                   | Lan and Reeves, 1998 <a href="#">50</a>           |
| <i>Streptomyces</i> (Actinobacteria)                                   | Chimeragenesis                                  | Ueda et al., 1999 <a href="#">51</a>              |
| <i>Thermomonospora chromogena</i><br>(Actinobacteria)                  | Intragenomic<br>heterogeneity<br>Chimeragenesis | Yap et al., 1999 <a href="#">52</a>               |
| <i>Actinomycetes</i> (Actinobacteria)                                  | Chimeragenesis                                  | Wang and Zhang, 2000 <a href="#">53</a>           |
| <i>Bradyrhizobium</i> (Proteobacteria)                                 | Chimeragenesis                                  | Parker, 2001 <a href="#">54</a>                   |
| <i>Streptococcus anginosus</i><br>(Firmicutes)                         | Chimeragenesis                                  | Schouls et al., 2003 <a href="#">55</a>           |
| Rhizobia (Proteobacteria)                                              | Chimeragenesis                                  | van Berkum et al. <a href="#">56</a>              |
| <i>Thermoanaerobacter tengcongensis</i><br>(Firmicutes)                | Intragenomic<br>heterogeneity                   | Acinas et al., 2004 <a href="#">57</a>            |
| <i>Desulfotomaculum kuznestovii</i><br>(Firmicutes)                    | Intragenomic<br>heterogeneity                   | Tuorova, et al., 2001 <a href="#">58</a>          |
| <i>Halosimplex carlsbadense</i><br>(Euryarchaeota)                     | Intragenomic<br>heterogeneity                   | Boucher et al., 2004 <a href="#">59</a>           |
| <i>Natrinema</i> sp. (Euryarchaeota)                                   |                                                 |                                                   |

---

|                                              |                               |                                          |
|----------------------------------------------|-------------------------------|------------------------------------------|
| <i>Rhizobium galegae</i> (Proteobacteria)    | Chimeragenesis                | Eardly et al., 2005 <a href="#">60</a>   |
| <i>Helicobacter</i> (Proteobacteria)         | Chimeragenesis                | Dewhirst et al., 2005 <a href="#">61</a> |
| <i>Scytonema hyalinum</i><br>(Cyanobacteria) | Intragenomic<br>heterogeneity | Johansen et al., 2017 <a href="#">62</a> |

---

**Supplementary Table S5. Oligonucleotide primers used in this study**

| Oligonucleotides  | Sequence (5' to 3')            |
|-------------------|--------------------------------|
| TTC1380Rev        | CTAGACCTCCTCCAAGGGCACC         |
| TTC1383Rev        | CTACACGTCTAGGATGACCTGGGC       |
| TTC1381_100OUT    | ACACCCTCGAGCTCCTCGAGGCCCTGGCCC |
| TTC1382_100OUT    | TCACCCTGACCCGGGGGAAGCCGGGAGAA  |
| TTC1858Fwd        | ATGAGCATCCCCGAGGAGCTTTGGCGCCGC |
| TTC1860DownFwd    | TAGCATGGCTTTTGCTGCGCGGGCG      |
| TTC1861Fwd        | ATGTCACGGGACCTTCTGGGCCTCGAGGGG |
| TTC1859UpRev      | ACCCCTCCTTACGGCAACAAAAA        |
| TTC1859Fwd300     | CTCATGCGCCACCTGGGGG            |
| Thermus_1F        | TTGTTGGAGAGTTTGATCCTGGCTCAGGG  |
| Thermus_1521R     | AGAAAGGAGGTGATCCAGCCGCACC      |
| Thermus_1R        | CCCTGAGCCAGGATCAAACCTCTCCAACAA |
| Thermus_1521F     | GGTGCGGCTGGATCACCTCCTTTCT      |
| Thermus_1F(AT)    | TTTGTGGAGAGTTTGATCCTGGCT       |
| Thermus_1499R(AT) | GGAGGTGATCCAGCCGCA             |
| Thermus_1R(AT)    | AGCCAGGATCAAACCTCTCCAACAAA     |
| Thermus_1499F(AT) | TGCGGCTGGATCACCTCC             |
| HgFwd             | ATGAAAAGCCTGAACTCACCGTG        |
| HgRev             | TTAGGCTGCCAGGTCGACGGAT         |

## References

- 45 Mylvaganam, S. & Dennis, P. P. Sequence heterogeneity between the two genes encoding 16S rRNA from the halophilic archaeobacterium *Haloarcula marismortui*. *Genetics* **130**, 399-410 (1992).
- 46 Sneath, P. H. Evidence from *Aeromonas* for genetic crossing-over in ribosomal sequences. *Int J Syst Bacteriol* **43**, 626-629, doi:10.1099/00207713-43-3-626 (1993).
- 47 Eardly, B., Wang, F. & Berkum, P. v. Corresponding 16S rRNA gene segments in Rhizobiaceae and *Aeromonas* yield discordant phylogenies. *Plant Soil* **186**, 69-74, doi:10.1007/978-94-011-5700-1\_9 (1996).
- 48 Cilia, V., Lafay, B. & Christen, R. Sequence heterogeneities among 16S ribosomal RNA sequences, and their effect on phylogenetic analyses at the species level. *Mol Biol Evol* **13**, 451-461, doi:10.1093/oxfordjournals.molbev.a025606 (1996).
- 49 Wang, Y., Zhang, Z. & Ramanan, N. The actinomycete *Thermobispora bispora* contains two distinct types of transcriptionally active 16S rRNA genes. *J Bacteriol* **179**, 3270-3276 (1997).
- 50 Lan, R. & Reeves, P. R. Recombination between rRNA operons created most of the ribotype variation observed in the seventh pandemic clone of *Vibrio cholerae*. *Microbiology* **144**, 1213-1221, doi:10.1099/00221287-144-5-1213 (1998).
- 51 Ueda, K., Seki, T., Kudo, T., Yoshida, T. & Kataoka, M. Two distinct mechanisms cause heterogeneity of 16S rRNA. *J Bacteriol* **181**, 78-82 (1999).
- 52 Yap, W. H., Zhang, Z. & Wang, Y. Distinct types of rRNA operons exist in the genome of the actinomycete *Thermomonospora chromogena* and evidence for horizontal transfer of an entire rRNA operon. *J Bacteriol* **181**, 5201-5209 (1999).
- 53 Wang, Y. & Zhang, Z. Comparative sequence analyses reveal frequent occurrence of short segments containing an abnormally high number of non-random base variations in bacterial rRNA genes. *Microbiology* **146**, 2845-2854, doi:10.1099/00221287-146-11-2845 (2000).
- 54 Parker, M. A. Case of localized recombination in 23S rRNA genes from divergent bradyrhizobium lineages associated with neotropical legumes. *Appl Environ Microbiol* **67**, 2076-2082, doi:10.1128/aem.67.5.2076-2082.2001 (2001).
- 55 Schouls, L. M., Schot, C. S. & Jacobs, J. A. Horizontal transfer of segments of the 16S rRNA genes between species of the *Streptococcus anginosus* group. *J Bacteriol* **185**, 7241-7246, doi:10.1128/jb.185.24.7241-7246.2003 (2003).
- 56 van Berkum, P. *et al.* Discordant phylogenies within the *rrn* loci of Rhizobia. *J Bacteriol* **185**, 2988-2998 (2003).
- 57 Acinas, S. G., Marcelino, L. A., Klepac-Ceraj, V. & Polz, M. F. Divergence and redundancy of 16S rRNA sequences in genomes with multiple *rrn* operons. *J Bacteriol* **186**, 2629-2635, doi:10.1128/JB.186.9.2629-2635.2004 (2004).

- 58 Turova, T. P., Kuznetsov, B. B., Novikova, E. V., Poltarau, A. B. & Nazina, T. N. Heterogeneity of nucleotide sequences of 16S ribosomal RNA genes from the *Desulfotomaculum kuznetsovii* type strain. *Mikrobiologija* **70**, 788-795 (2001).
- 59 Boucher, Y., Douady, C. J., Sharma, A. K., Kamekura, M. & Doolittle, W. F. Intragenomic heterogeneity and intergenomic recombination among haloarchaeal rRNA genes. *J Bacteriol* **186**, 3980-3990, doi:10.1128/jb.186.12.3980-3990.2004 (2004).
- 60 Eardly, B. D., Nour, S. M., van Berkum, P. & Selander, R. K. Rhizobial 16S rRNA and dnaK genes: mosaicism and the uncertain phylogenetic placement of *Rhizobium galegae*. *Appl Environ Microbiol* **71**, 1328-1335, doi:10.1128/aem.71.3.1328-1335.2005 (2005).
- 61 Dewhirst, F. E. *et al.* Discordant 16S and 23S rRNA gene phylogenies for the genus *Helicobacter*: implications for phylogenetic inference and systematics. *J Bacteriol* **187**, 6106-6118, doi:10.1128/jb.187.17.6106-6118.2005 (2005).
- 62 Johansen, J. R. *et al.* Highly divergent 16S rRNA sequences in ribosomal operons of *Scytonema hyalinum* (Cyanobacteria). *PLoS One* **12**, e0186393, doi:10.1371/journal.pone.0186393 (2017).
